# Supplementary material for: Enhancing C2H2/C2H4 separation by incorporating low-content sodium in covalent organic frameworks
Source: Royal Society of Chemistry journal article supplement (doi:10.1039/c9qi00922a), 2019-01-01
Supplement: c9qi00922a1.pdf [file c9qi00922a1.pdf]

# **Enhancing C<sub>2</sub>H<sub>2</sub>/C<sub>2</sub>H<sub>4</sub> separation by incorporating low-content sodium in covalent organic framework**

Yuan Tao,<sup>a</sup> Rajamani Krishna,<sup>b</sup> Le Le Gong,<sup>a</sup> Li Xiao Yang,<sup>a</sup> Ya Ling Fan,<sup>a</sup> Li Wang,<sup>a</sup> Zhi Gao,<sup>a</sup> Jian Bo Xiong,<sup>a</sup> Li Jun Sun,<sup>a</sup> and Feng Luo<sup>a\*</sup>

<sup>a</sup>State Key Laboratory for Nuclear Resources and Environment, and School of Biology, Chemistry and Material Science, East China University of Technology, Nanchang, Jiangxi 344000, China

<sup>b</sup>Van't Hoff Institute for Molecular Sciences, University of Amsterdam, Science Park 904, 1098 XH Amsterdam, The Netherlands

## **Table of Contents**

S1. Materials and instrumentation

S2. Detailed experiment

S3. TGA curve

S4. FT-IR spectrum of COFs

S5. Solid state <sup>13</sup>C NMR spectrum of COFs

S6. XRD analysis

S7. View of the COF-ECUT-1 structure

S8. Gas adsorption studies of COFs

S9. Isothermic heats of adsorption of COF-ECUT-1

S10. Isothermic heats of adsorption of Na@COF-ECUT-1

S11. Effect of moisture

S12. References

## S1. Materials and Instrumentation.

1,2-dichlorobenzene (99%), n-butanol (99%), phloroglucinol (99%), p-phenylenediamine (99%) and trifluoroacetic acid (99%) were purchased from Macklin (Shanghai) Inc. Hexamethylenetetramine (99%) was purchased from Alfa Aesar (Beijing) Co., Ltd. All other reagents were obtained from commercial suppliers and used as received unless otherwise noted.

Power X-ray diffraction (PXRD) patterns of samples were obtained at room temperature by a Bruker D8 ADVANCE X-ray at 40 mA and 40 kV using Cu K $\alpha$  ( $\lambda = 1.5405 \text{ \AA}$ ) radiations from 2° to 30° (2 $\theta$  angle range), the simulated powder patterns were calculated by Mercury 1.4. The N<sub>2</sub> adsorption-desorption isotherms were obtained at 77 K on a Belsorp-max adsorption apparatus using ultrahigh-purity-grade (>99.999%) N<sub>2</sub>. Each sample was degassed at 110 °C for 12 h under ultrahigh vacuum before measurement. Infrared spectra (IR) were performed in Thermo Scientific Nicolet iS5 FT-IR spectrometer with the 500-4000 cm<sup>-1</sup>. Scanning electron microscope (SEM) and Energy Dispersive Spectrometer (EDS) was carried out on a Hitachi S-4800 microscope. Thermal gravimetric analysis (TGA) was performed by SDT Q600 TGA instrument from 30 to 800 °C in N<sub>2</sub> atmosphere at a constant rate of 10 °C/min. <sup>13</sup>C NMR spectra were recorded on Bruker Avance 600 MHz spectrometer. The C<sub>2</sub>H<sub>2</sub> and C<sub>2</sub>H<sub>4</sub> single-component adsorption isotherms with 99.999% purity gas were carried out at 298 and 273 K water bath on a Belsorp-max adsorption apparatus after degassed at 110 °C for 12 h under ultrahigh vacuum. Elemental analysis used PerkinElmer 2400 Series II CHNS under ultrahigh-purity-grade (>99.999%) He at 975 °C.

## S2. Detailed experiment

**Synthesis of 2,4,6-triformylphloroglucinol:** To hexamethylenetetramine (15.098 g, 108 mmol) and phloroglucinol (6.014 g, 49 mmol) under N<sub>2</sub> was added 90 mL trifluoroacetic acid. The solution was heated at 100 °C for ca. 2.5 h. Approximately 150 mL of 3 M HCl was added and the solution was heated at 100 °C for 1 h. After cooling to room temperature, the solution was filtered through Celite, extracted with ca. 350 mL dichloromethane, dried over magnesium sulfate, and filtered. Rotary evaporation of the solution afforded 1.23 g (5.87 mmol, 11%) of an off-white powder. <sup>1</sup>H NMR indicated near 99% purity; a pure sample was obtained by sublimation. <sup>1</sup>H NMR (400 MHz, CDCl<sub>3</sub>, 25 °C)  $\delta$  14.12 (s, 1H, OH), 10.15 (s, 1H, CHO) ppm. <sup>13</sup>C NMR (100 MHz, CDCl<sub>3</sub>, 25 °C)  $\delta$  192.01 (CHO), 173.57 (Ph-C2), 102.91 (Ph-C1) ppm. Calcd for C, 51.44; H, 2.88; N, 0.00. Found: C 51.38; H 2.80; N, 0.00.

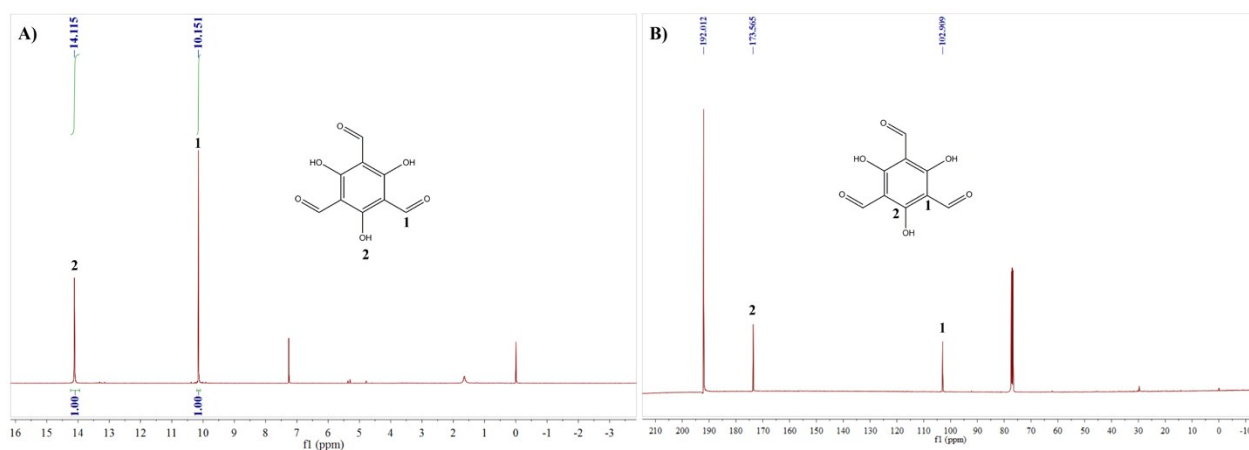

**Fig. S1** A)  $^1\text{H}$  NMR (400 MHz,  $\text{CDCl}_3$ , 25 °C) spectrum of 2,4,6-triformylphloroglucinol. B)  $^{13}\text{C}$  NMR (100 MHz,  $\text{CDCl}_3$ , 25 °C) spectrum of 2,4,6-triformylphloroglucinol.

**Synthesis of 2,5-diaminobenzenesulfonic acid:** To p-phenylenediamine (2.7 g, 25 mmol) was add 20% fuming sulfuric acid (33 g, 66 mmol). The solution was heated at 145 °C for ca. 7 h. Approximately 4 mL deionized water was added, and the solution was heated at 135 °C for 3 h. Cooling to 30 °C for static crystallization for 2 h. Approximately 2 mL deionized water was added and adjusted pH 4 to 5 with 30% sodium hydroxide. Cooled to 10 °C and filtered to obtain a product 3.8 g (20 mmol, 80%), HPLC purity is greater than 98%.  $^1\text{H}$  NMR (400 MHz, DMSO, 25 °C)  $\delta$  7.38 (d, 1H, Ph-H1), 6.92 (dd, 1H, Ph-H3), 6.79 (d, 1H, Ph-H2), 4.55-9.10 (br., 4H,  $\text{NH}_2$ ) ppm.  $^{13}\text{C}$  NMR (100 MHz, DMSO, 25 °C)  $\delta$  139.50 (Ph-C4), 131.15 (Ph-C2), 123.41 (Ph-C1), 122.04 (Ph-C5), 120.56 (Ph-C6), 117.78 (Ph-C3) ppm. Calcd for C, 38.29; H, 4.28; N, 14.88; S, 17.04. Found: C 38.26; H 4.29; N, 14.83; S, 17.02.

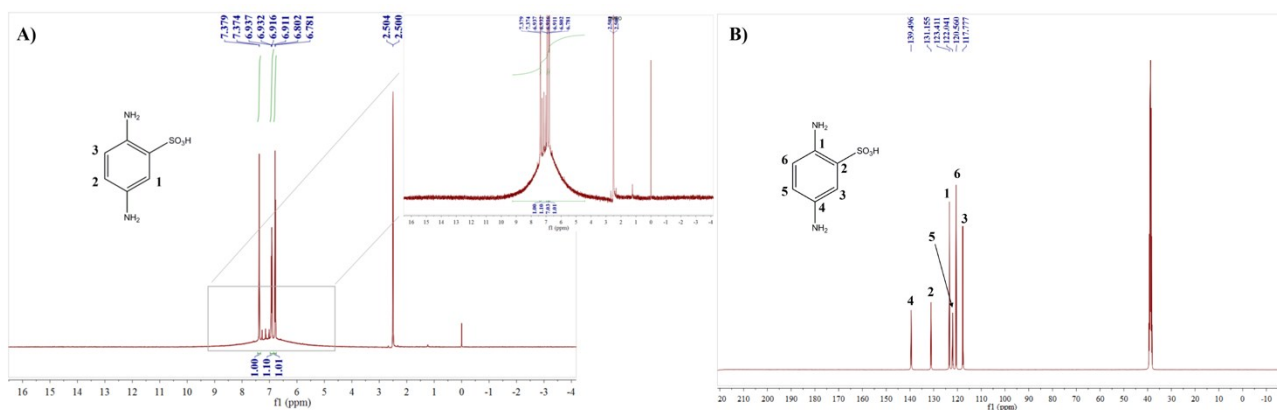

**Fig. S2** A)  $^1\text{H}$  NMR (400 MHz, DMSO, 25 °C) spectrum of 2,5-diaminobenzenesulfonic acid. B)  $^{13}\text{C}$  NMR (100 MHz, DMSO, 25 °C) spectrum of 2,5-diaminobenzenesulfonic acid.

**Synthesis of COF-ECUT-1.** A mixture of 2,4,6-triformylphloroglucinol (63 mg, 0.3 mmol) and 2,5-diaminobenzenesulfonic acid (84.7 mg, 0.45 mmol) and a drop of n-butanol: 1,2-dichlorobenzene (1:1 v/v) was taken in Pyrex tube. The mixture was sonicated for 20 min, followed by addition of 0.5 mL of 3 M aqueous acetic acid. After that, the tube was degassed by freeze-pump-thaw cycles for three times, sealed under vacuum and heated at 120 °C for 3 days. The reaction mixture was cooled

to room temperature and washed with deionized water, dimethylacetamide and acetone. The resulting dark red powder was dried at 60 °C under vacuum for 12 hours.

**Synthesis of Na@COF-ECUT-1.** 100 mg COF-SO<sub>3</sub>H added in 20 mL glass bottles with 1 M sodium carbonate solution for 30 hours. Then the resulted solid samples were washed with deionized water and methanol, and further dried at 60 °C under vacuum for 12 hours.

**DFT calculation method.** The periodic density functional theory calculations were performed by using the Vienna Ab initio Simulation Package (VASP) code.<sup>1</sup> The Perdew-Burke-Ernzerhof (GGA-PBE) functional was utilized to calculate the exchange-correlation energy, and the project-augmented wave generalized gradient approximation (PAW-GGA) pseudopotentials were adopted to describe the electron-ion interaction.<sup>2-3</sup> All the structures were optimized aiming to the global energy minimum, fully relaxed until the residual force convergence value on each tom being less 0.05 eV/Å. The Brillouin zone was sampled by  $3 \times 3 \times 1$  Gamma k-point mesh and the wave functions were expanded using a plane-wave basis set with kinetic energy cutoff of 500 eV. Spin-polarization was calculations with the lowest energy magnetic configurations were identified. All of the above structures were established by Materials Studio.

The binding energy was calculated follow:

$$E_b = E_{*g} - E^* - E_g \times n$$

Where the  $E_b$  means binding energy,  $E_{*g}$  represents the ground state energy after loading gas molecules, the  $E^*$  is the energy of cleanly unabsorbed and the  $E_g$  is the energy of pure gas at standard conditions,  $n$  represents the number of the gas molecules are adsorbed in COF pores.<sup>4</sup>

**Table S1.** The binding energy (eV) of these COFs with loading of guest molecules.

|                        | $E^*$        | $E_{*C_2H_2}$ | $E_{*C_2H_4}$ | $E_{C_2H_2}$ | $E_{C_2H_4}$ | $E_b^{C_2H_2}$ | $E_b^{C_2H_4}$ |
|------------------------|--------------|---------------|---------------|--------------|--------------|----------------|----------------|
| COF-SO <sub>3</sub> H  | -<br>1144.16 | -<br>1282.34  | -<br>1336.33  | -22.93       | -31.96       | -0.60          | -0.41          |
| COF-SO <sub>3</sub> Na | -<br>1144.45 | -<br>1284.42  | -<br>1338.30  | -22.93       | -31.96       | -2.39          | -2.09          |

### S3. TGA curve

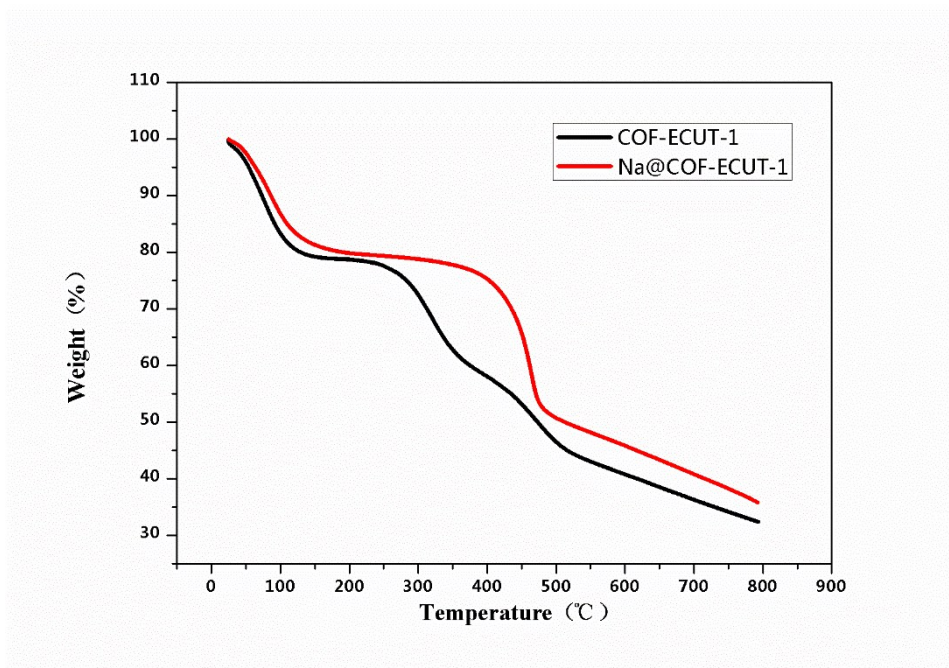

Fig. S3 TG data of COF-ECUT-1 and Na@COF-ECUT-1 under N<sub>2</sub> atmosphere.

#### S4. FT-IR spectrum of COFs

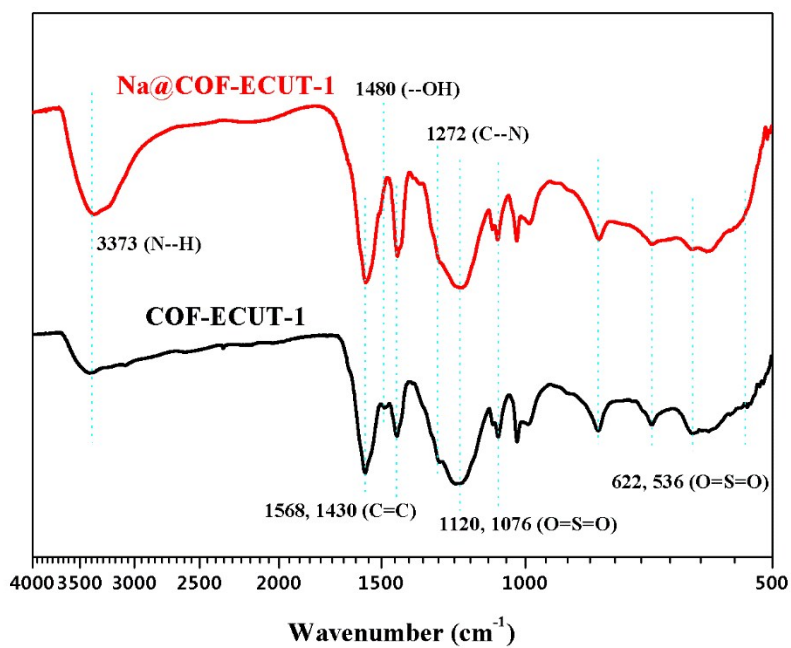

Fig. S4 IR spectrum of COF-ECUT-1 and Na@COF-ECUT-1.

## S5. Solid state $^{13}\text{C}$ NMR spectrum of COFs

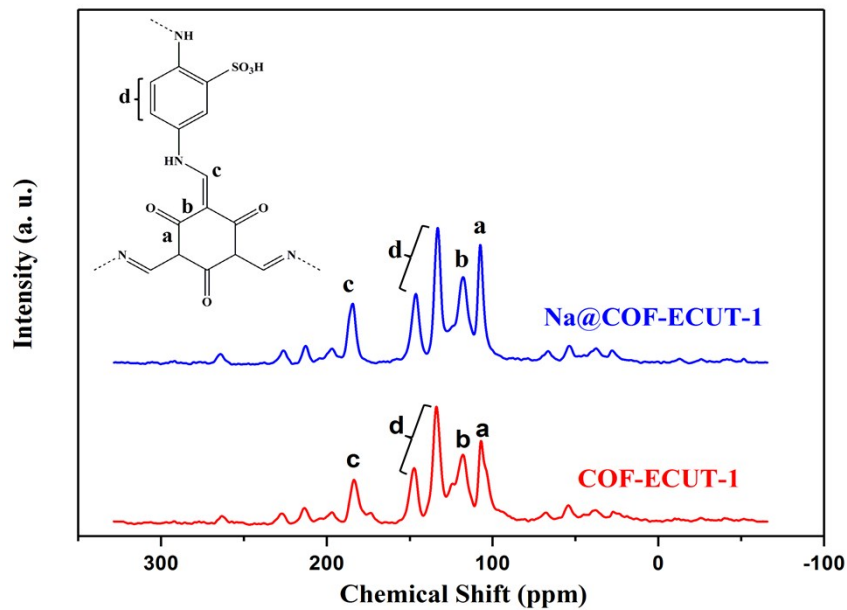

Fig. S5  $^{13}\text{C}$  CP/MAS NMR spectrum of COF-ECUT-1 and Na@COF-ECUT-1.

## S6. XRD analysis

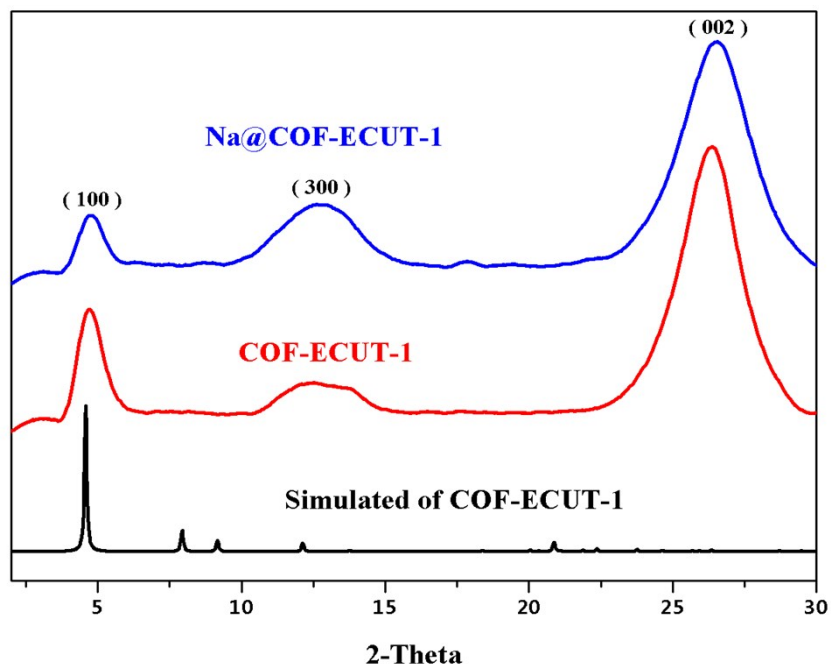

Fig. S6 The simulated and measured PXRD patterns of COF-ECUT-1 and Na@COF-ECUT-1.

## S7. View of the COF-ECUT-1 structure

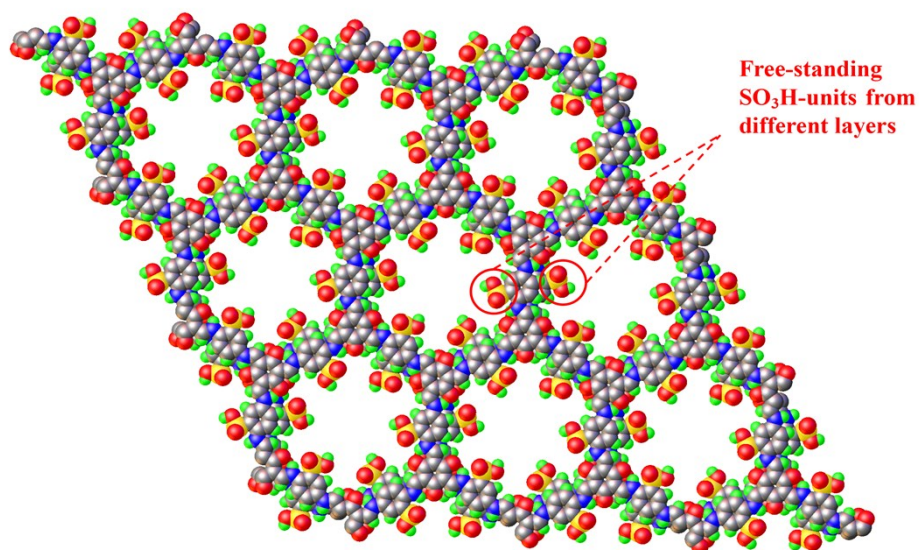

Fig. S7 View of the COF-ECUT-1 structure with free-standing SO<sub>3</sub>H-units from different layers.

## S8. Gas adsorption studies of COFs

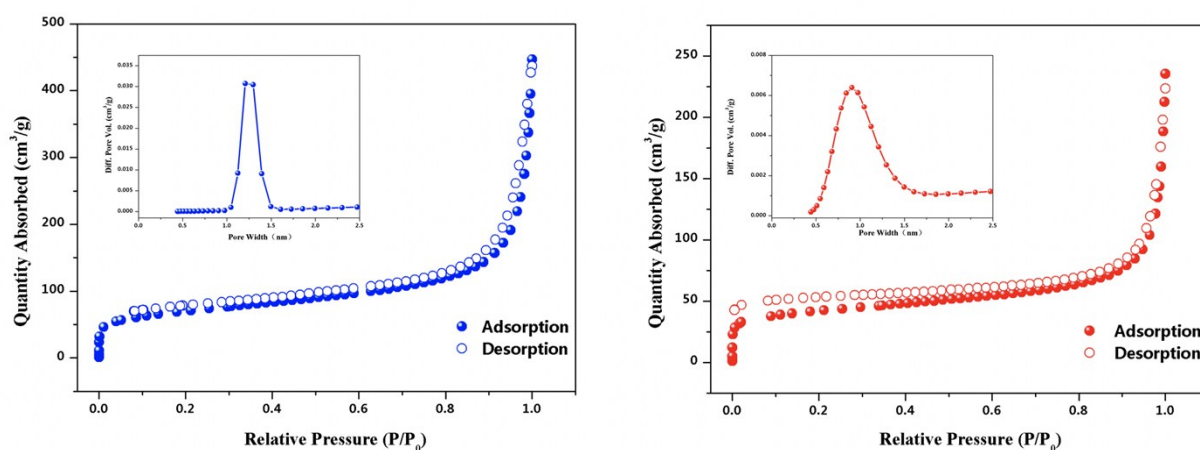

Fig. S8 Left: N<sub>2</sub> adsorption-desorption isotherms (77 K) of COF-ECUT-1 with the inset of the distribution of pore size. Right: N<sub>2</sub> adsorption-desorption isotherms (77 K) of Na@COF-ECUT-1 with the inset of the distribution of pore size.



### S9. Isotheric heats of adsorption of COF-ECUT-1

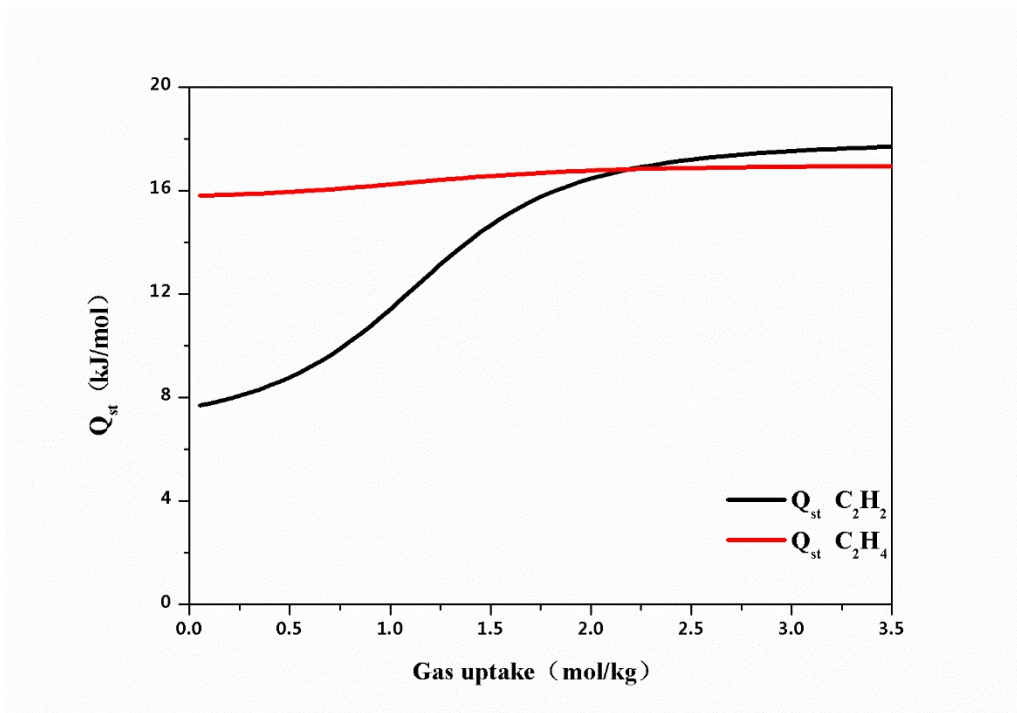

Fig. S9 Isotheric heats of adsorption for  $C_2H_2$  (black) and  $C_2H_4$  (red) of COF-ECUT-1.

### S10. Isotheric heats of adsorption of Na@COF-ECUT-1

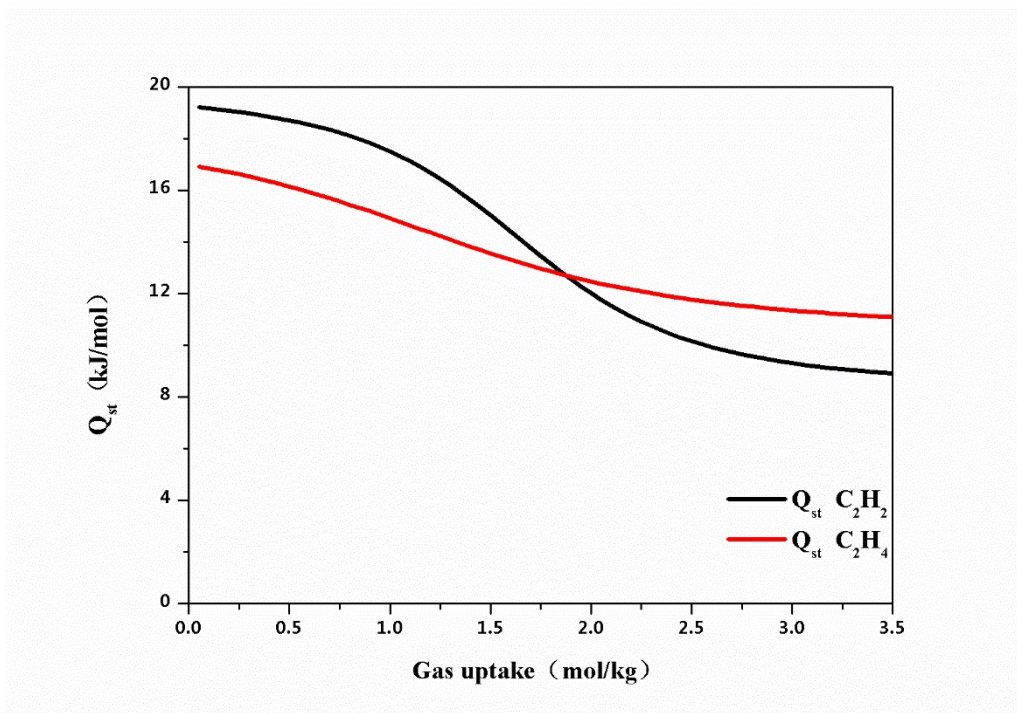

Fig. S10 Isotheric heats of adsorption for  $C_2H_2$  (black) and  $C_2H_4$  (red) of Na@COF-ECUT-1.



## S11. Effect of moisture

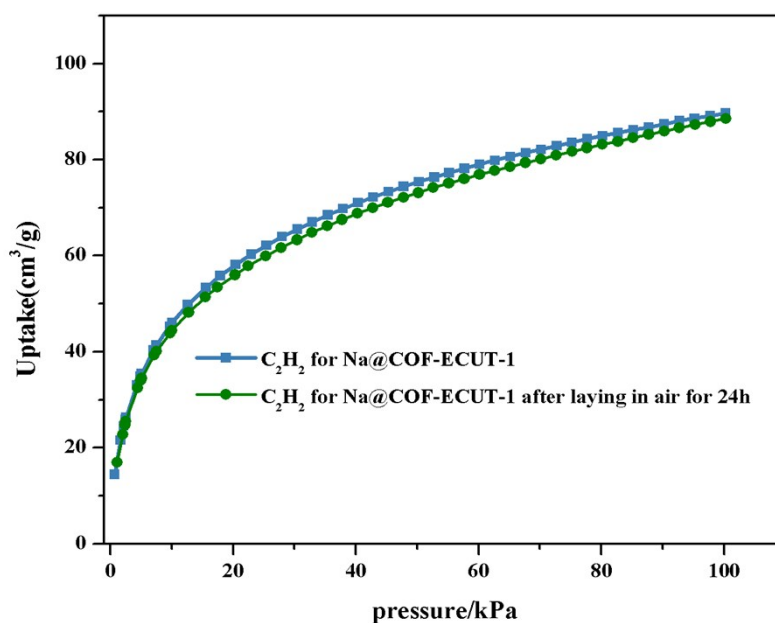

**Fig. S11** A comparison of  $C_2H_2$  adsorption for the samples of **Na@COF-ECUT-1** and the counterpart after laying in air for 24 h.

## S12. References

1. G. Kresse and J. Hafner, *Phys. Rev. B*, 1993, **48**, 13115-13118.
2. S. Grimme, S. Ehrlich and L. Goerigk, *J. Comput. Chem.*, 2011, **32**, 1456-1465.
3. J. P. Perdew, K. Burke and M. Ernzerhof, *Phys. Rev. Lett.*, 1996, **77**, 3865-3868.
4. O. T. Qazvini, R. Babarao, Z. L. Shi, Y. B. Zhang and S. G. Telfer, *J. Am. Chem. Soc.*, 2019, **141**, 5014-5020.
